1 Title: Lizard feeding enhances *Ixodes pacificus* vector competency

2 Short Title: Host blood meal modifies tick vector competency

3

4 Kacie Ring<sup>1</sup>, Lisa Couper<sup>2</sup>, Anne L. Sapiro<sup>3</sup>, Fauna Yarza<sup>3</sup>, X. Frank Yang<sup>4</sup>, Keith Clay<sup>5</sup>,  
5 Chase Mateusiak<sup>6</sup>, Seemay Chou<sup>3, 7\*</sup>, Andrea Swei<sup>7\*</sup>

6

7 Institutional info

8 1. Department of Ecology, Evolution, and Marine Biology, University of California,  
9 Santa Barbara, California, 93106

10 2. Department of Biology, Stanford University; 327 Campus Drive, Stanford, CA  
11 94305

12 3. Department of Biochemistry and Biophysics, University of California, San  
13 Francisco; 600 16th Street, San Francisco, CA, 94158

14 4. Department of Microbiology and Immunology, Indiana University School of  
15 Medicine, 635, Barnhill Drive, MS409J, Indianapolis, IN 46202

16 5. Department of Ecology and Evolutionary Biology, Tulane University, 6823  
17 Charles Avenue, New Orleans, LA 70118

18 6. Center for Genome Science and Systems Biology, 4515 McKinley Ave, St. Louis,  
19 MO 63110

20 7. Chan Zuckerberg Biohub, San Francisco, CA, 94158

21 8. Department of Biology, San Francisco State University; 1600 Holloway Ave, San  
22 Francisco, CA 94132

23

24 \*Corresponding Authors

25 Andrea Swei

26 San Francisco State University, 1600 Holloway Avenue, San Francisco, CA 94132

27 (415) 317-6009

28 [aswei@sfsu.edu](mailto:aswei@sfsu.edu)

29

30 Seemay Chou

31 University of California, San Francisco, 600 16<sup>th</sup> Street, San Francisco, CA, 94158

32 (415) 653-8989

33 [Seemay.chou@ucsf.edu](mailto:Seemay.chou@ucsf.edu)

34

35

36 **Keywords:** vector competency, *Ixodes pacificus*, *Borrelia burgdorferi*, host blood meal,

37 RNAseq

38

39

40

41

42

43

44

45

46

## 47 **Abstract**

48           A vector's susceptibility and ability to transmit a pathogen— termed vector  
49 competency—determines disease outcomes, yet the ecological factors influencing tick  
50 vector competency remain largely unknown. *Ixodes pacificus*, the vector of *Borrelia*  
51 *burgdorferi* (*Bb*) in the western U.S., feeds on rodents, birds, and lizards. While rodents  
52 and birds are reservoirs for *Bb* and infect juvenile ticks, lizards are *Bb*-refractory.  
53 Despite *I. pacificus* feeding on a range of hosts, it is undetermined how larval host  
54 bloodmeal identity affects future nymphal vector competency. We experimentally  
55 evaluate the influence of larval host bloodmeal on *Bb* acquisition by nymphal *I.*  
56 *pacificus*. Larval *I. pacificus* were fed on either lizards or mice and after molting, nymphs  
57 were fed on *Bb*-infected mice. We found that lizard-fed larvae were significantly more  
58 likely to become infected with *Bb* during their next bloodmeal than mouse-fed larvae.  
59 We also conducted the first RNA-seq analysis on whole-bodied *I. pacificus* and found  
60 significant upregulation of antioxidants and antimicrobial peptides in the lizard-fed  
61 group. Our results indicate that the lizard bloodmeal significantly alters vector  
62 competency and gene regulation in ticks, highlighting the importance of host bloodmeal  
63 identity in disease transmission and upends prior notions about the role of lizards in  
64 Lyme disease transmission.

65

## 66 **Introduction**

67           Vector competency—the ability of a vector to successfully acquire and transmit a  
68 pathogen—and the factors that modulate it are increasingly the focus of efforts to  
69 control the emergence and spread of vector-borne zoonotic diseases [1–5].

70 Manipulation of vector competency has been discussed as a disease prevention  
71 strategy in mosquitoes, tsetse flies, and triatomine bugs [2, 3, 6]. In these vectors, rearing  
72 of naturally resistant populations, modifications of vector endosymbionts, and gene  
73 editing have been studied and implemented as applications of biological control to alter  
74 vector competency and prevent disease transmission. While strides have been made in  
75 understanding and manipulating vector competency in many systems, these studies  
76 highlight the complexity of vector-pathogen interactions and suggest that a more  
77 mechanistic understanding of disease transmission holds promise for disease control.  
78 For tick-borne pathogen systems in particular, the plasticity of vector competency and  
79 responsiveness to environmental or biological inputs remains poorly understood.

80 Tick-borne diseases constitute 40% of the emerging vector-borne diseases  
81 worldwide [7–9] and are sensitive to changing abiotic and biotic interactions driven by  
82 land use change and increased globalization [4, 8, 10, 11]. In the northern hemisphere,  
83 Lyme disease is the most common vector-borne disease, causing an estimated 300,000  
84 cases annually in the U.S. [8, 12, 13]. It is caused by the bacterial agent *Borrelia*  
85 *burgdorferi* (*Bb*) and vectored by *Ixodes spp.* ticks, whose life history involves blood-  
86 feeding on a wide range of hosts during each of their three life stages (larvae, nymph  
87 and adult) [14]. Tick blood-feeding induces a suite of major physiological changes in the  
88 tick including antimicrobial activity [15] and cuticular reconstruction [16, 17]. In addition,  
89 the identity of the blood meal host has important consequences for pathogen  
90 acquisition, tick survivorship, and microbiome composition [18–21].

91 Mounting evidence indicates that microbiome composition impacts vector  
92 competency through induced immunological responses, morphological changes, or

93 direct competition between microbial components of the tick microbiome [22–26].  
94 However, the precise relationship between microbiome composition and tick  
95 competency for *Bb* is not well understood [27, 28]. Tick *Bb* acquisition is a complex  
96 process that requires the pathogen to evade numerous tick immune pathways and  
97 antimicrobial peptides [4, 6, 7, 8] followed by successful colonization of the midgut [9,  
98 10]. There is evidence that these interactions may be influenced by biotic interactions  
99 such as host bloodmeal identity or microbiome interactions [11-13]. Manipulation of the  
100 microbiome in laboratory-reared *Ixodes scapularis* found that lower microbiome diversity  
101 reduced *Bb* colonization through induced changes in tick midgut morphology [24]. In  
102 *Ixodes pacificus*, greater microbiome diversity was associated with *Bb* colonization in  
103 one study but not another [19, 28]. The life history of *Ixodes pacificus*, the Lyme disease  
104 vector in the western U.S., provides a unique opportunity for natural microbiome  
105 manipulation. Juvenile *I. pacificus* feed predominantly on the western fence lizard,  
106 *Sceloporus occidentalis*, a *Bb*-refractory host, but will also parasitize reservoir  
107 competent hosts, typically rodents such as *Peromyscus* spp. mice, western gray  
108 squirrels (*Sciurus griseus*), and dusky-footed woodrats (*Neotoma fuscipes*) [29–31]. In  
109 addition to varying greatly in reservoir competency, blood meals from these host  
110 species can lead to stark differences in tick microbiome composition [19]. Lizard-feeding  
111 results in a significant reduction in *I. pacificus* microbiome diversity relative to rodent-  
112 feeding [19].

113           Given recent findings that lizard-feeding significantly reduces microbiome  
114 diversity [19] and experimental evidence of tick microbiome diversity affecting *Bb*  
115 colonization success [24], we sought to determine the direct effect of blood meal identity

116 on *I. pacificus* vector competency in a tick pathogen acquisition experiment. We fed  
117 larval ticks on either lizards or mice then subsequently fed those ticks on *Bb*-infected  
118 mice and found that the ticks with previous lizard bloodmeals were significantly more  
119 susceptible to *Bb* infection. We then investigated mechanisms by which host blood meal  
120 may alter vector competency by conducting the first RNA-seq analysis on whole-bodied  
121 *I. pacificus* nymphs and comparing gene expression profiles for *I. pacificus* ticks  
122 following mouse or lizard larval blood meals. We find significant differences in tick  
123 vector competency based on larval host blood meal identity and detect multiple immune  
124 and metabolic factors that may alter *I. pacificus* vector competency for the Lyme  
125 disease pathogen.

126

## 127 **Materials and methods:**

128

### 129 *Ixodes pacificus* collection

130 Fed *I. pacificus* larvae were collected from either western fence lizards  
131 (*Sceloporous occidentalis*) or deer mice (*Peromyscus maniculatus*). As lizards have  
132 naturally high larval burdens of *I. pacificus* (mean=25) [ref. 32], we collected ticks from  
133 *S. occidentalis* by capturing and holding lizards in drop off cages suspended over water  
134 for 3-4 days in a temporary field lab to collect replete ticks. We then transferred all  
135 collected, replete larvae to the lab facilities at San Francisco State University. Natural  
136 burdens of *I. pacificus* larvae on *Peromyscus spp.* are very low [32]. Because of low  
137 natural tick burdens, we experimentally attached up to 200 larval *I. pacificus* (BEI  
138 Resources, Manassas, VA) to *Peromyscus maniculatus* (Peromyscus Genetic Stock

139 Center, Columbia, SC) in the lab. We collected and stored all replete ticks from lizard  
140 and mouse drop-off procedures under standard rearing conditions of 23°C and 90%  
141 relative humidity until they molted eight weeks later.

142

#### 143 *Host inoculation and tick Bb acquisition experiments*

144 *Borrelia burgdorferi* cultures were grown until they reached a concentration of  $10^6$   
145 spirochetes/mL [33]. Mice were inoculated intradermally with 100  $\mu$ L of *Bb* culture  
146 (10,000 total spirochetes). Eight weeks post inoculation, successful *Bb* acquisition in the  
147 mice was determined via nested PCR of ear tissue targeting the 5S-23S rRNA spacer  
148 region [34].

149 Five C3H/HeJ mice were used to feed nymphs (Jackson Laboratory, Bar Harbor,  
150 Maine). Three of the C3H/HeJ mice were inoculated with *Bb* leaving the remaining two  
151 mice as uninfected controls. Nymphs that fed as larvae on either lizards or mice were  
152 then placed on either *Bb*-infected or uninfected C3H/HeJ mice for nymphal feeding.  
153 Host-to-tick acquisition experiments were conducted in three separate trials. The first  
154 trial was conducted at Indiana University, where lizard-fed and mouse-fed nymphs were  
155 fed on C3H/HeJ mice infected with *Bb* at a concentration of  $10^5$  spirochetes/mL (1,000  
156 total spirochetes). The second and third trials were conducted in the animal facilities at  
157 San Francisco State University where lizard-fed and mouse-fed ticks were  
158 subsequently fed on C3H/HeJ mice infected with  $10^7$  and  $10^6$  spirochetes/mL  
159 (100,000 and 10,000 spirochetes total), respectively.

160

#### 161 *Nucleic acid isolation and pathogen testing*

162           After completing their bloodmeal, nymphs were placed under standard rearing  
163 conditions for 24 hours, flash frozen, and stored at -80°C until nucleic acid extraction.  
164 Prior to extraction, ticks were thoroughly surface sterilized with successive 1 mL washes  
165 of 3% hydrogen peroxide, 70% ethanol, and de-ionized H<sub>2</sub>O to remove surface  
166 contaminants. The tick was then lysed and homogenized using the Qiagen TissueLyser  
167 II (QIAGEN, Valencia, CA, USA). Tick samples were extracted simultaneously for total  
168 DNA and RNA using the Qiagen AllPrep DNA/RNA Micro Kit (QIAGEN, Valencia, CA,  
169 USA). DNA and RNA concentrations were measured using a Qubit Fluorometer  
170 (ThermoFisher Scientific, Waltham, CA, USA) in preparation for pathogen testing and  
171 library preparation. RNA content and quality were evaluated using a Bioanalyzer  
172 (Agilent, Santa Clara, CA, USA). DNA from engorged *Bb*-fed nymphs was tested for  
173 infection in triplicate by qPCR [35].

174

#### 175 *Statistical analyses*

176           To determine if larval bloodmeal host was a predictor of nymphal pathogen  
177 acquisition, we used a generalized mixed-effect model (GLMM) with a binomial error  
178 distribution. We used larval host bloodmeal (lizard or mouse feeding) as a fixed effect  
179 and trial as a random effect to account for experimental variation between trials.  
180 Analyses were performed using the glmm package (v.1.4.2 ) in R [36].

181

#### 182 *Tick transcriptome analysis*

183           Ticks from the third pathogen transmission experiment were used for  
184 transcriptome analysis. Unfed nymphs and engorged nymphs were divided into six



185 experimental groups (Fig. 1). Our six experimental groups were composed of ticks that  
186 either fed on a lizard or a mouse as a larva. Then, molted nymphs from either larval  
187 bloodmeals either remained unfed, fed on an uninfected mouse, or fed on a *Bb*-  
188 inoculated mouse (Fig. 1). Each experimental group will hereinafter be described with  
189 the following abbreviations: unfed nymphs are referred to as “UF” and fed nymphs are  
190 referred to by whether they were fed on a *Bb*-positive “+Bb,” or *Bb*-negative “-Bb”  
191 C3H/HeJ mouse. Additionally, the larval bloodmeal (lizard or mouse) in each  
192 experimental group is indicated in the subscript following the abbreviation.

193         Groups one and two, which represent our unfed nymphs, “UF<sub>lizard</sub>” and “UF<sub>mouse</sub>”  
194 (Fig. 1), were set aside to examine the effect of the lizard or mouse larval bloodmeal on  
195 *I. pacificus* gene expression. The remaining four groups were engorged nymphal ticks.  
196 Uninfected control groups three and four, “-Bb<sub>lizard</sub>” and “-Bb<sub>mouse</sub>” were nymphs that fed  
197 on uninfected C3H/HeJ mice during their nymphal bloodmeal (Fig. 1). Groups five and  
198 six, “+Bb<sub>lizard</sub>” and “+Bb<sub>mouse</sub>” were nymphs that fed on *Bb* infected C3H/HeJ (Fig. 1).

199         We prepared three replicates from each of the six experimental tick feeding  
200 conditions (Fig. 1) for a total of 18 libraries. We pooled three individual ticks for each  
201 experimental replicate. RNA-seq libraries were prepared from total RNA extracted from  
202 ticks followed by rRNA depletion using Depletion of Abundant Sequences by  
203 Hybridization (DASH) [37]. The NEBNext Ultra II Directional RNA Library Prep Kit for  
204 Illumina (New England Biolabs, E7760S) was used to make RNA-seq libraries following  
205 the standard manual protocol. After constructing RNA-seq libraries from total RNA,  
206 reads containing rRNA sequences from *Ixodes spp.*, *Bb*, and mouse were depleted  
207 using DASH, which targets Cas9 to abundant sequences in RNA-seq libraries. We

208 utilized previously designed guide RNAs against mice and *Ixodes spp.* rRNAs [38], and  
209 we designed additional complementary guides to improve rRNA depletion of tick and *Bb*  
210 sequences using RNA-seq libraries made from total RNA from an *I. scapularis* nymph  
211 and *Bb* B-31 culture (Table S1).

212

### 213 *rRNA depletion with DASH*

214 Guide RNAs were designed using DASHit (<http://dashit.czbiohub.org/>), and  
215 prepared from DNA oligos as in Gu et al. (2016) following the protocol for *In Vitro*  
216 Transcription for dgRNA Version 2 ([dx.doi.org/10.17504/protocols.io.3bpgimn](https://doi.org/10.17504/protocols.io.3bpgimn)). The  
217 complete protocol for rRNA depletion with DASH can be found in the supplementary  
218 methods. Following DASH, RNA-seq libraries were sequenced on an Illumina NextSeq  
219 with paired-end 75 base pair reads. Fastq files and raw read counts have been  
220 deposited in the Gene Expression Omnibus (GEO) under accession  
221 number GSE173109.

222

### 223 *RNA-seq sequence processing and analysis*

224 RNA-seq reads were trimmed of adapters and bases with quality score lower  
225 than 20 using Cutadapt [39] via Trim Galore! v0.6.5 and then mapped to the *Ixodes*  
226 *scapularis* ISE6 genome (assembly GCF\_002892825.2\_ISE6\_asm2.2\_deduplicated)  
227 accessed from NCBI RefSeq, using STAR (v2.7.3a) [40]. Reads mapping to predicted  
228 genes (gtf-version 2.2, genome build: ISE6\_asm2.2\_deduplicated, NCBI genome build  
229 accession: GCF\_002892825.2, annotation source: NCBI *Ixodes scapularis* Annotation  
230 Release 100) were tabulated using Subread FeatureCounts (v2.0.0) [41], counting

231 primary hits only. DESeq2 v1.26.0 [42], was used to determine differential expression  
232 between groups. Volcano plots from the ‘Enhanced Volcano’ package in R, were used  
233 to visualize significant differential gene expression between experimental groups [43].  
234 The visualization tools heat map and principle coordinate analysis plots in Deseq2 were  
235 utilized to visualize similarities across our gene expression profiles [42]. All code in our  
236 Deseq2 analysis is available at:  
237 [https://github.com/choulabucsf/lpac\\_DE\\_Ring\\_et\\_al\\_2021](https://github.com/choulabucsf/lpac_DE_Ring_et_al_2021)

238

## 239 **Results**

### 240 *Host-to-tick Bb acquisition experiment*

241 The effect of larval host bloodmeal on *I. pacificus* nymphal vector competency  
242 was examined in a host-to-tick pathogen acquisition experiment where replete larval *I.*  
243 *pacificus* were obtained from mice or lizards and then subsequently fed on *Bb*-infected  
244 C3H/HeJ mice (Fig. 1). A total of 36 lizard-fed (+Bb<sub>lizard</sub>) and 46 mouse-fed (+Bb<sub>mouse</sub>) *I.*  
245 *pacificus* nymphs were used across three experimental trials (Fig. S2).

246 *I. pacificus* nymphs that fed on *Bb*-inoculated C3H/HeJ mice were significantly  
247 more likely to become infected if they previously fed on lizards as larvae than if they fed  
248 on mice ( $\chi^2$  (1, N = 82) = 7.8266,  $p$  = .0051). During their nymphal bloodmeal, 64% of  
249 lizard-fed ticks (N= 23/36) became infected with *Bb* compared to 30% of the mouse-fed  
250 ticks (N=14/46; Fig. 2). Even after accounting for trial as a random effect, our GLMM  
251 analyses found that the lizard larval bloodmeal is a significant, positive predictor of *Bb*  
252 acquisition in *I. pacificus* (Table 1). These results support our hypothesis that the host

253 bloodmeal source may shape intrinsic vector competency of ticks across at least one  
254 life stage transition.

255

### 256 *Experimental transcriptomic differences*

257 To investigate potential explanations for the differences in vector competency  
258 between lizard-fed and mouse-fed ticks, we conducted an RNA-seq analysis to  
259 compare gene expression between ticks with different blood histories and pathogen  
260 exposure. A total of 18 RNA-seq libraries were prepared from the six experimental  
261 groups, each represented by three replicates and resulting in over 370 million total  
262 reads (Fig. 1). With no available annotated *Ixodes pacificus* genome, we aligned our  
263 reads to the ISE6 *Ixodes scapularis* genome [44]. Mapping rates among replicates  
264 averaged at 45% with 15 million reads per library. Sequencing statistics for each  
265 replicate are presented in Table S2.

266 To visualize overall differences in gene expression profiles across the  
267 experimental groups, we created a heatmap and a PCA plot of our 18 replicates. The  
268 heatmap, generated from sample-to-sample distances, is based on read counts for all  
269 genes and showed that tick engorgement status (unfed vs. engorged) induced  
270 significant changes in *I. pacificus* gene expression (Fig. 3a). Additionally, the PCA plot  
271 indicated significant distinction of overall gene expression between unfed ticks of either  
272 bloodmeal type, UF<sub>lizard</sub> and UF<sub>mouse</sub> (Fig. 3b). The engorged experimental groups  
273 (groups three to six) had similar gene expression profiles and did not distinctly cluster  
274 together by experimental condition (Fig. 3b).

275

276 *Differential gene expression*

277 To investigate the mechanism through which host blood alters tick vector  
278 competency, we took a global transcriptomic approach to identify key genes or  
279 pathways modulated by mouse or lizard hosts. Differential gene expression analyses  
280 focused on several pairwise comparisons to examine transcriptomic differences  
281 between 1) the lizard versus mouse bloodmeal in the unfed group 2) unfed versus fed  
282 ticks, and 3) bloodmeal identity distinctions between *Bb* exposed groups.

283 The comparison between our unfed nymphs (UF<sub>lizard</sub> vs. UF<sub>mouse</sub>), demonstrated  
284 that the lizard bloodmeal induced distinct transcriptomic changes in *I. pacificus* with 468  
285 significantly differentially expressed genes (DEGs). While many of the DEGs remain  
286 undescribed, some of the highest upregulated genes induced by the lizard bloodmeal in  
287 the unfed group included antioxidants and antimicrobial peptides (Fig. 4a). The  
288 antioxidant glutathione peroxidase was the most significant DEG and was upregulated  
289 48.5-fold after the lizard bloodmeal compared to mouse bloodmeal. Other tick  
290 antioxidants that were upregulated after the lizard bloodmeal include peroxidase  
291 (upregulated 21-fold) and glutathione-S-transferase (upregulated four-fold; Fig. 4a). We  
292 also found several DEGs that are related to the regulation of antimicrobial peptides but  
293 have never been described in *I. pacificus* ticks, such as acanthoscurrin-1,  
294 acanthoscurrin-2-like, micropulsin and micropulsin isoform, which were upregulated by  
295 27.9, 104, 4, and 22.6-fold, respectively (Fig. 4a).

296 To analyze the DEGs between engorged and un-engorged ticks, we combined  
297 the two unfed groups (UF<sub>lizard</sub> & UF<sub>mouse</sub>) as our reference 'unfed' group and compared  
298 this group to all of the 'engorged' nymphs (i.e. -Bb<sub>lizard</sub>, -Bb<sub>mouse</sub>, +Bb<sub>lizard</sub>, & +Bb<sub>mouse</sub>).

299 Engorgement induced significant gene expression differences, producing 6730  
300 significant DEGs with a majority of difference in expression being upregulated genes in  
301 the engorged groups (Fig. 4b). Of the top 100 most significant DEGs, 25% were related  
302 to cuticle formation. Other notable genes that were differentially expressed include the  
303 antioxidant and detoxifying genes, glutathione peroxidase and sulfotransferase, which  
304 were both upregulated 4096-fold in the engorged group. Over a hundred DEGs between  
305 unengorged and engorged ticks remain uncharacterized.

306 Despite significant differences in pathogen acquisition success between the  
307 +Bb<sub>lizard</sub> and +Bb<sub>mouse</sub> in pathogen transmission experiments, only 25 genes were  
308 differentially expressed between the two groups (Fig. 4c). The two most significantly  
309 DEGs included exonuclease V-like (upregulated 32-fold) and 4-coumarate –CoA ligase  
310 (downregulated 8-fold) in +Bb<sub>lizard</sub> (Fig. 4c). No genes that are known to be related to  
311 immune function were detected as differentially expressed in the +Bb<sub>lizard</sub> vs. +Bb<sub>mouse</sub>  
312 comparison, with 7 of the 25 differentially regulated genes classified as uncharacterized.

313

## 314 **Discussion**

315 Vector competency is considered an intrinsic property of a vector that determines  
316 its ability to acquire, maintain, and transmit pathogens [45], but the extent to which it is  
317 modulated by biotic or abiotic factors is poorly understood, especially in tick-borne  
318 pathogen systems. Here, we conducted a tick *Bb* acquisition experiment and  
319 transcriptome analysis on *I. pacificus* to determine if and by what potential mechanisms  
320 host bloodmeal history affects *I. pacificus* vector competency for the Lyme disease  
321 pathogen, *Bb*. Through *Bb* feeding experiments, we found that larval bloodmeal history

322 significantly affects *I. pacificus* pathogen acquisition, a key component of vector  
323 competency. When ticks that fed on either lizards or mice as larvae fed on *Bb*-infected  
324 mice as nymphs, the previously lizard-fed ticks were twice as likely to acquire the  
325 pathogen. Further, significant transcriptomic signatures were detected between ticks  
326 with different bloodmeal histories. Gene expression analysis identified an upregulation  
327 of tick antioxidants and antimicrobial peptides in *I. pacificus* that fed on lizards, which  
328 may play a role in altering tick vector competency for *Bb*. Our results open the door for a  
329 potential mechanistic understanding of how host blood meal affects *I. pacificus* gene  
330 expression and the ecological factors that control *I. pacificus* susceptibility to *Bb*.

331         Recent studies suggest that tick microbiome composition can impact vector  
332 competency [17] and that host bloodmeal source can shape microbiome community  
333 structure [18, 23]. These two recent findings motivated this study to test whether the  
334 lizard bloodmeal host that has been previously shown to reduce tick microbiome  
335 diversity [19] can have subsequent effects on vector competency. Ticks with prior lizard  
336 or mouse bloodmeal histories displayed significant differences in pathogen acquisition  
337 when fed on mice infected with *Bb*. Across three separate experimental trials, we found  
338 that a prior lizard bloodmeal significantly increased the acquisition of *Bb* in nymphal *I.*  
339 *pacificus*. These results were surprising, especially given that infected *I. pacificus* that  
340 feed on *S. occidentalis* are cleared of their infection [46, 47]. The *Bb*-refractory nature of  
341 *S. occidentalis* has long been held as evidence of the lizard's importance in maintaining  
342 lower prevalence of Lyme disease in the western U.S. and it likely contributes to lower  
343 disease risk relative to the northeastern U.S. However, whether this *Bb*-refractory  
344 property could be sustained transstadially in *I. pacificus* was unknown. Our results

345 indicate that lizard-feeding does not preclude *Bb* infection in future life stages of *I.*  
346 *pacificus*, but rather enhances pathogen acquisition success relative to ticks with a prior  
347 mouse bloodmeal (Table 1). These results indicate that the acute and long-term  
348 consequences of a lizard bloodmeal on pathogen transmission are divergent.

349         The role of the microbiome in tick vector competency is unresolved [24, 28]. In a  
350 prior study, lower microbiome diversity in *I. scapularis* was associated with lower *Bb*  
351 colonization success due to decreased expression of genes involved in gut epithelium  
352 renewal, which enhances *Bb* colonization [24]. Therefore, we predicted that lizard-fed  
353 ticks, previously shown to have significantly lower microbiome species diversity than  
354 mouse-fed ticks [19], would similarly have lower *Bb* infection prevalence. However, our  
355 *Bb* acquisition experiment found that *I. pacificus* microbiome diversity, resulting from  
356 lizard-feeding [48], and pathogen transmission success are negatively correlated. This  
357 finding may be due to species-specific differences between *I. scapularis* and *I. pacificus*  
358 or be driven by the use of different experimental procedures used to manipulate the  
359 vector microbiome. Additionally, lizard feeding may affect tick vector competency  
360 through altering specific microbes rather than altering overall microbial diversity.  
361 Ultimately, the role of microbiome diversity and composition on pathogen acquisition  
362 success in *Ixodes* spp. remains uncertain and future studies are needed to disentangle  
363 the complicated interactions of these microbes.

364         Our RNA-seq analysis of *I. pacificus* with different bloodmeal histories revealed  
365 potential mechanisms that could be driving the differences observed in tick pathogen  
366 acquisition. Larval bloodmeal identity and engorgement have large impacts on *I.*  
367 *pacificus* gene expression (Fig. 3). Unfed nymphs clustered significantly by larval



368 bloodmeal type (lizard vs. mouse; Fig. 3b), indicating that larval bloodmeal source  
369 induced distinct transcriptomic alterations in *I. pacificus*. We analyzed gene expression  
370 profiles in unfed nymphs right after they molted from larvae to nymph. Our analysis  
371 suggests that the effect of the larval bloodmeal on *I. pacificus* gene expression is  
372 carried through the transstadial molt and is present prior to the initiation of the nymphal  
373 bloodmeal. Among the unfed ticks, bloodmeal history drove divergence of 468  
374 significantly expressed genes between un-engorged lizard and mouse fed ticks. The  
375 most significant DEG between unfed ticks with different bloodmeal histories was  
376 glutathione peroxidase in the lizard-fed group (Fig. 5a). Glutathione peroxidase is an  
377 important anti-oxidative enzyme, that works by reducing H<sub>2</sub>O<sub>2</sub> and detoxifying OH  
378 radicals and prevents oxidative stress and cell damage in the tick [48, 49]. Two other  
379 known anti-oxidative enzymes, peroxidase and glutathione S-transferase were  
380 significantly upregulated after the lizard bloodmeal (Fig. 5b&c). A nutritional  
381 dependence on blood has required ticks to evolve and produce anti-oxidants to digest  
382 an inherently toxic meal containing high levels of iron and pro-oxidant levels [49].  
383 Notably, glutathione peroxidase is homologous to SALP25d, a tick antioxidant produced  
384 in the salivary glands that has been shown to promote the transmission of *Bb* from tick  
385 to host and protects *Bb* from harmful hydroxyl radicals *in vitro* [16]. The upregulation of  
386 glutathione peroxidase in lizard-fed ticks has the potential to directly benefit *Bb*  
387 colonization from host to tick during the nymphal bloodmeal by increasing antioxidant  
388 concentration and protecting *Bb* from the harmful oxidative components of blood.

389         There was also a strong signal of microbial defense signals in unfed tick  
390 comparison. The antimicrobial peptides (AMPs) acanthoscurrin-1, acanthoscurrin-2,

391 micropulsin, and a micropulsin isoform were all significantly upregulated in the unfed  
392 nymphs with prior lizard bloodmeals relative to prior mouse bloodmeals ( $UF_{\text{lizard}}$ ; Fig. 5d-  
393 g). Acanthoscurrin is a glycine-rich cationic AMP, known to be expressed in the  
394 hemocytes of tarantula spiders, *Acanthoscurria gomesiana*, and has activity against the  
395 yeast, *Candida albicans*, and gram-negative bacteria [51]. Micropulsin is a cysteine-rich  
396 AMP with histidine-rich regions, found in the hemolymph of the cattle tick, *Rhipicephalus*  
397 *microplus*, with high activity against gram-positive bacteria and fungus [52]. Neither of  
398 these AMPs have been detected in *Ixodes pacificus* prior to this study, but these results  
399 indicate that they may play an important role in pathogen acquisition and warrant further  
400 study. While lizard blood feeding contributes to the expression of AMPs, it is unclear  
401 what upstream components initiate their production. The antimicrobial activity may be  
402 an outcome of an initiated humoral immune response or derived from host immune  
403 effector molecules, as demonstrated when *Ixodes scapularis* feeds on a *Bb*-infected  
404 mouse [25]. To understand how the expression of these AMPs occur, future gene  
405 expression studies should examine the tick immune response to the lizard larval  
406 bloodmeal at multiple time points to track the immune response at different stages of  
407 feeding. Interestingly, the upregulation of AMPs with broad activity against microbes  
408 coincides with a previously described study showing that a lizard bloodmeal significantly  
409 reduces *I. pacificus* microbiome diversity after feeding [18]. Our results indicate that the  
410 lizard bloodmeal is associated with the production of AMPs that may reduce microbe-  
411 microbe competition for *Bb* colonization in future bloodmeals.

412 To further characterize the physiological changes that occur during *I. pacificus*  
413 host feeding, we analyzed unfed versus fed ticks, 24 hours after ticks completed their

414 nymphal bloodmeal. Our study confirmed that engorgement induces a large number of  
415 transcriptional changes to the physical structure of the tick [46] (Fig. 3b). The greatest  
416 number of DEGs was between fed and unfed ticks (Fig. 4). Genes related to cuticle  
417 formation, antioxidant production, and detoxification were all significantly upregulated in  
418 fed ticks and are consistent with structural reformation that occurs during the  
419 engorgement process when ticks must rapidly synthesize a new cuticle over the course  
420 of taking a large bloodmeal [14]. Glutathione peroxidase and sulfotransferase were  
421 highly upregulated during engorgement and are critical for detoxifying the massive host  
422 bloodmeal and protect ticks from harmful oxidative stress inherent in blood feeding [47].  
423 These results, while unsurprising, indicate that transcriptomic changes during *I.*  
424 *pacificus* engorgement are similar to the physiological alterations found in *Ixodes*  
425 *scapularis* [46].

426       Gene expression of *I. pacificus* is heavily shaped by engorgement status and  
427 bloodmeal history in unfed ticks but among the engorged nymphs (groups 5&6; Fig. 1),  
428 there was not a strong signal of bloodmeal history or infection status (Fig. 3b). Despite  
429 the significant differences in pathogen acquisition between host bloodmeal experimental  
430 groups (Fig. 2), only 25 genes with no known pathogen or immune function were  
431 differentially expressed between these groups. Comparing these results to our gene  
432 expression analysis from unfed nymphs, the strongest divergence in gene expression is  
433 present in the unfed ticks. This suggests that the physiological changes induced by the  
434 larval bloodmeal has lasting effects into the nymphal stage.

435       We document a strong correlation between host bloodmeal and vector  
436 competency, but there were limitations to our study. Naturally low burdens prevented us

437 from using field-collected ticks for the mouse bloodmeal [32] and use of field-collected  
438 questing larvae is problematic because it is difficult to verify whether a tick had a  
439 previous, incomplete bloodmeal [27]. Our transcriptomic results indicate that bloodmeal  
440 history was only significantly different in the unfed nymphal group while fed nymphs  
441 were less apparent, which strongly suggests that larval host blood meal identity played  
442 a larger role in gene expression than tick source (Fig. 3).

443         Despite these intriguing results, our study highlights the importance of a more  
444 complete annotation of the reference transcriptome for *Ixodes spp.* ticks. A large  
445 proportion of DEGs remain uncharacterized indicating additional investigation into tick  
446 molecular function and transcriptomics is needed. The lack of differentially expressed  
447 genes in our comparison of *Bb*-exposed nymphs with different bloodmeal histories could  
448 be attributed to the timing of RNA sampling (24 hours after completed bloodmeal).  
449 Examination of gene expression before, during, and immediately after feeding would  
450 improve insight into the mechanism of pathogen colonization into *I. pacificus*.  
451 Additionally, future experiments should focus on understanding the role of antioxidants  
452 and the AMPs identified in this study in modifying tick vector competency. We found a  
453 strong association between lizard bloodmeal history and antioxidant activity as well as  
454 AMP production. These responses coupled with naturally high natural tick burdens and  
455 preferential feeding on lizards may suggest an evolutionary benefit to feeding on the  
456 western fence lizard for *I. pacificus* and perhaps *Bb*. Additional research should  
457 investigate whether changes in vector competency are propagated through additional  
458 life stages (i.e., nymphal to adult and adult to eggs), and its effect on the epigenetic  
459 memory of ticks over time [50].

460           The public health burden of Lyme disease is increasing, and diagnosis and  
461 treatment are expensive and imperfect. The complexity of tick-host-pathogen  
462 interactions involve many competing interactions, making intervention or prevention of  
463 disease transmission very difficult. A better understanding of the molecules, microbes,  
464 and antigens involved in vector competency presents a different approach to prevention  
465 [2, 3, 49, 51]. Identifying molecular and microbial drivers of tick survival and vector  
466 competency are attractive targets for novel control methods [4]. Using the perturbation  
467 of natural host bloodmeal, our study identified multiple molecular components that may  
468 be important in the successful acquisition of *Bb* in *I. pacificus* and identifies potential  
469 new targets for manipulating and preventing the transmission of tick-borne diseases.

470

#### 471 **Acknowledgements**

472 We thank the Chan Zuckerberg Biohub for sequencing. KR and AS want to  
473 acknowledge funding support from the Pacific Southwest Regional Center of Excellence  
474 for Vector-Borne Diseases funded by the U.S. Centers for Disease Control  
475 and Prevention (Cooperative Agreement 1U01CK000516. This work was also funded by  
476 NSF (#1427772, 1745411, 174037 to AS) and NIH (R01AI132851 to SC). Additional  
477 support for SC was provided by Chan Zuckerberg Biohub and the Pew Biomedical  
478 Scholars Program. FY is supported by the HHMI Gilliam Fellowship and ALS by the Life  
479 Sciences Research Foundation.

480

#### 481 **Conflict of Interest**

482 The authors declare no conflict of interest

## 483 References

- 484 1. Beard C Ben, Cordon-Rosales C, Durvasula R V. Bacterial symbionts of the triatominae  
485 and their potential use in control of Chagas disease transmission. *Annu Rev Entomol.*  
486 2002; **47**: 123–141.
- 487 2. Iturbe-Ormaetxe I, Walker T, O' Neill SL. Wolbachia and the biological control of  
488 mosquito-borne disease. *EMBO Rep.* 2011; **12**: 508–518.
- 489 3. Pais R, Lohs C, Wu Y, Wang J, Aksoy S. The obligate mutualist *Wigglesworthia*  
490 *glossinidia*; influences reproduction, digestion, and immunity processes of its host, the  
491 tsetse fly. *Appl Environ Microbiol.* 2008; **74**: 5965-5974.
- 492 4. de la Fuente J, Antunes S, Bonnet S, Cabezas-Cruz A, Domingos AG, Estrada-Peña A,  
493 et al. Tick-pathogen interactions and vector competence: identification of molecular  
494 drivers for tick-borne diseases. *Front Cell Infect Microbiol.* 2017; **7**: 114.
- 495 5. Beerntsen BT, James AA, Christensen BM. Genetics of mosquito vector competence.  
496 *Microbiol Mol Biol Rev.* 2003; **64**: 115–137.
- 497 6. Kean J, Rainey SM, McFarlane M, Donald CL, Schnettler E, Kohl A, et al. Fighting  
498 arbovirus transmission: natural and engineered control of vector competence in *Aedes*  
499 mosquitoes. *Insects* 2015; **6(1)**: 236-278
- 500 7. Jones KE, Patel NG, Levy MA, Storeygard A, Balk D, Gittleman JL, et al. Global trends in  
501 emerging infectious diseases. *Nature* 2008; **451**: 990–993.
- 502 8. Swei A, Couper LI, Coffey LL, Kapan D, Bennett S. Patterns, drivers, and challenges of  
503 vector-borne disease emergence. *Vector Borne Zoonotic Dis* 2020; **20**: 159–170.
- 504 9. Schwartz, Amy M., Hinkley, Alison F., Mead, Paul S., Hook, Sarah A., Kugeler KJ.  
505 Surveillance for Lyme Disease—United States, 2008-2015. *Center for Disease Control*  
506 *and Prevention* 2017.
- 507 10. van Baalen M, Sabelis MW. The dynamics of multiple infection and the evolution of  
508 virulence. *Am Nat.* 1995; **146**: 881–910.

- 509 11. Keesing F, Belden LK, Daszak P, Dobson A, Harvell CD, Holt RD, et al. Impacts of  
510 biodiversity on the emergence and transmission of infectious diseases. *Nature* 2010; **468**:  
511 647–652.
- 512 12. Mysterud A, Jore S, Østerås O, Viljugrein H. Emergence of tick-borne diseases at  
513 northern latitudes in Europe: a comparative approach. *Sci Reports* 2017; **7**: 16316.
- 514 13. Kilpatrick AM, Randolph SE. Drivers, dynamics, and control of emerging vector-borne  
515 zoonotic diseases. *Lancet* 2012; **380**: 1946–1955.
- 516 14. LoGiudice K, Ostfeld RS, Schmidt KA, Keesing F. The ecology of infectious disease:  
517 Effects of host diversity and community composition on Lyme disease risk. *Proc Natl*  
518 *Acad Sci.* 2003; **100**: 567-571.
- 519 15. Smith AA, Navasa N, Yang X, Marques A, Anguita J, Pal U, et al. Cross-species  
520 interferon signaling boosts microbicidal activity within the tick vector. *Cell Host Microbe*  
521 2016; **20**: 91–98.
- 522 16. Perner J, Provazník J, Schrenková J, Urbanová V, Ribeiro JMC, Kopáček P. RNA-seq  
523 analyses of the midgut from blood- and serum-fed *Ixodes ricinus* ticks. *Nat Publ Gr* 2016;  
524 **8**: 1–18.
- 525 17. Gulia-Nuss M, Nuss AB, Meyer JM, Sonenshine DE, Roe RM, Waterhouse RM, et al.  
526 Genomic insights into the *Ixodes scapularis* tick vector of Lyme disease. *Nat Commun.*  
527 2016; **7**:10507.
- 528 18. Sonenshine DE, Hynes WL, Ceraul SM, Mitchell R, Benzine T. Host blood proteins and  
529 peptides in the midgut of the tick *Dermacentor variabilis* contribute to bacterial control.  
530 *Exp Appl Acarol.* 2005; **36**: 207–223.
- 531 19. Swei A, Kwan JY. Tick microbiome and pathogen acquisition altered by host blood meal.  
532 *ISME J.* 2017; **11**: 813–816.
- 533 20. Muturi EJ, Dunlap C, Ramirez JL, Rooney AP, Kim C-H. Host blood-meal source has a  
534 strong impact on gut microbiota of *Aedes aegypti*. *FEMS Microbiol Ecol.* 2018; **95**.

- 535 21. Landesman WJ, Mulder K, Allan BF, Bashor LA, Keesing F, Logiudice K, et al. Ticks and  
536 tick-borne diseases potential effects of blood meal host on bacterial community  
537 composition in *Ixodes scapularis* nymphs. *Ticks Tick Borne Dis.* 2019; **10**: 523–527.
- 538 22. Dong Y, Manfredini F, Dimopoulos G. Implication of the mosquito midgut microbiota in  
539 the defense against malaria parasites. *PLoS Pathog.* 2009; **5(5)**:e1000423.
- 540 23. Wang Y, Gilbreath TM 3rd, Kukutla P, Yan G, Xu J. Dynamic gut microbiome across life  
541 history of the malaria mosquito *Anopheles gambiae* in Kenya. *PLoS One* 2011;  
542 **6(9)**:e24767.
- 543 24. Narasimhan S, Rajeevan N, Liu L, Zhao YO, Heisig J, Pan J, et al. Gut microbiota of the  
544 tick vector *Ixodes scapularis* modulate colonization of the Lyme disease spirochete. *Cell*  
545 *Host Microbe* 2014; **15**: 58–71.
- 546 25. Narasimhan S, Schuijt TJ, Abraham NM, Rajeevan N, Coumou J, Graham M, et al.  
547 Modulation of the tick gut milieu by a secreted tick protein favors *Borrelia burgdorferi*  
548 colonization. *Nat Commun.* 2017; **8**: 184.
- 549 26. Ross BD, Hayes B, Radey MC, Lee X, Josek T, Bjork J, et al. *Ixodes scapularis* does not  
550 harbor a stable midgut microbiome. *ISME J.* 2018; **12**: 2596–2607.
- 551 27. Eisen L. Vector competence studies with hard ticks and *Borrelia burgdorferi* sensu lato  
552 spirochetes: A review. *Ticks Tick Borne Dis.* 2020; **11**: 101359.
- 553 28. Kwan JY, Griggs R, Chicana B, Miller C, Swei A. Vertical vs. horizontal transmission of  
554 the microbiome in a key disease vector, *Ixodes pacificus*. *Mol Ecol.* 2017; **26**: 6578–6589.
- 555 29. Lane RS, Mun J, Stubbs HA. Horizontal and vertical movements of host-seeking *Ixodes*  
556 *pacificus* (Acari: Ixodidae) nymphs in a hardwood forest. *J Vector Ecol.* 2009; **34**: 252–  
557 266.
- 558 30. Eisen L, Dolan MC, Piesman J, Lane RS. Vector competence of *Ixodes pacificus* and *I.*  
559 *spinipalpis* (Acari: Ixodidae), and reservoir competence of the dusky-footed woodrat  
560 (*Neotoma fuscipes*) and the deer mouse (*Peromyscus maniculatus*), for *Borrelia bissetii*.



- 561 *J Med Entomol.* 2003; **40**: 311–320.
- 562 31. Lane RS, Mun J, Eisen RJ, Eisen L. Western gray squirrel (Rodentia: Sciuridae): a  
563 primary reservoir host of *Borrelia burgdorferi* in Californian oak woodlands? *J Med*  
564 *Entomol.* 2005; **42**: 388–396.
- 565 32. Swei A, Briggs CJ, Lane RS, Ostfeld RS. Impacts of an introduced forest pathogen on the  
566 risk of Lyme disease in California. *Vector Borne Zoonotic Dis* 2012; **12**: 623–632.
- 567 33. Polovinchik Y. Study of BSK II and BSK H Media for Culturing Lyme Disease  
568 Spirochetes. 2002. Protocol, University of California, Berkeley.
- 569 34. Lane RS, Steinlein DB, Mun J. Human behaviors elevating exposure to *Ixodes pacificus*  
570 (*Acari: Ixodidae*) nymphs and their associated bacterial zoonotic agents in a hardwood  
571 forest. *J Med Entomol.* 2004; **41**: 239–248.
- 572 35. Barbour AG, Bunikis J, Travinsky B, Hoen AG, Diuk-Wasser MA, Fish D, et al. Niche  
573 partitioning of *Borrelia burgdorferi* and *Borrelia miyamotoi* in the same tick vector and  
574 mammalian reservoir species. *Am J Trop Med Hyg.* 2009; **81**: 1120–1131.
- 575 36. Knudson C, Benson S, Geyer C, Jones G. Likelihood-based inference for generalized  
576 linear mixed models: Inference with the R package glmm. *Stat.* 2021; **10**: e339.
- 577 37. Gu W, Crawford ED, O'Donovan BD, Wilson MR, Chow ED, Retallack H, et al. Depletion  
578 of Abundant Sequences by Hybridization (DASH): using Cas9 to remove unwanted high-  
579 abundance species in sequencing libraries and molecular counting applications. *Genome*  
580 *Biol.* 2016; **17**: 41.
- 581 38. Dynerman D, Lyden A, Quan J, Caldera S, Mcgeever A, Dimitrov B, et al. Designing and  
582 implementing programmable depletion in sequencing libraries with DASHit. *bioRxiv* 2020;  
583 epub ahead of print 13 January 2020; doi: <https://doi.org/10.1101/2020.01.12.891176>
- 584 39. Martin M. Cutadapt removes adapter sequences from high-throughput sequencing reads.  
585 *EMBnet.journal* 2011; **17(1)**: 10-12.
- 586 40. Dobin A, Davis CA, Schlesinger F, Drenkow J, Zaleski C, Jha S, et al. STAR: ultrafast

- 587 universal RNA-seq aligner. *Bioinformatics* 2013; **29**: 15–21.
- 588 41. Liao Y, Smyth GK, Shi W. featureCounts: an efficient general purpose program for  
589 assigning sequence reads to genomic features. *Bioinformatics* 2013; **30**: 923–930.
- 590 42. Love MI, Huber W, Anders S. Moderated estimation of fold change and dispersion for  
591 RNA-seq data with DESeq2. *Genome Biol.* 2014; **15**: 550.
- 592 43. Blighe K, Rana S, Lewis M. EnhancedVolcano: Publication-ready volcano plots with  
593 enhanced coloring and labeling. *R package version 1.4.0*.  
594 <https://github.com/kevinblighe/EnhancedVolcano>. .
- 595 44. Miller JR, Koren S, Dilley KA, Harkins DM, Stockwell TB, Shabman RS, et al. A draft  
596 genome sequence for the Ixodes scapularis cell line, ISE6. *F1000Research* 2018; **7**: 297.
- 597 45. Beerntsen BT, James AA, Christensen BM. Genetics of mosquito vector competence.  
598 *Microbiol Mol Biol Rev.* 2000; **64**: 115–137.
- 599 46. Lane RS, Quistad GB. Borreliacidal factor in the blood of the western fence lizard  
600 (*Sceloporus occidentalis*). *J Parasitol.* 1998; **84**: 29–34.
- 601 47. Kuo MM, Lane RS, Giclas PC. A comparative study of mammalian and reptilian  
602 alternative pathway of complement-mediated killing of the Lyme disease spirochete  
603 (*Borrelia burgdorferi*). *J Parasitol.* 2000; **86**: 1223–1228.
- 604 48. Swei A, Kwan JY. Tick microbiome and pathogen acquisition altered by host blood meal.  
605 *ISME J.* 2017; **11**: 813–816.
- 606 49. Galay RL, Hernandez EP, Kusakisako K, Talactac MR, Fujisaki K, Tanaka T. Ticks'  
607 antioxidant complex: a defense stronghold and a potential target for their control.  
608 *Advances in Medicine and Biology.* 2017; 231–255.
- 609 50. De S, Kitsou C, Sonenshine DE, Pedra JHF, Fikrig E, Kassis JA, et al. Epigenetic  
610 regulation of tick biology and vectorial capacity. *Trends Genet.* 2021; **37(1)**: 8-11.
- 611 51. Bhowmick B, Han Q. Understanding tick biology and its implications in anti-tick and  
612 transmission blocking vaccines against tick-borne pathogens. *Front Vet Sci.* 2020; **7**: 319.

613 **Figures**

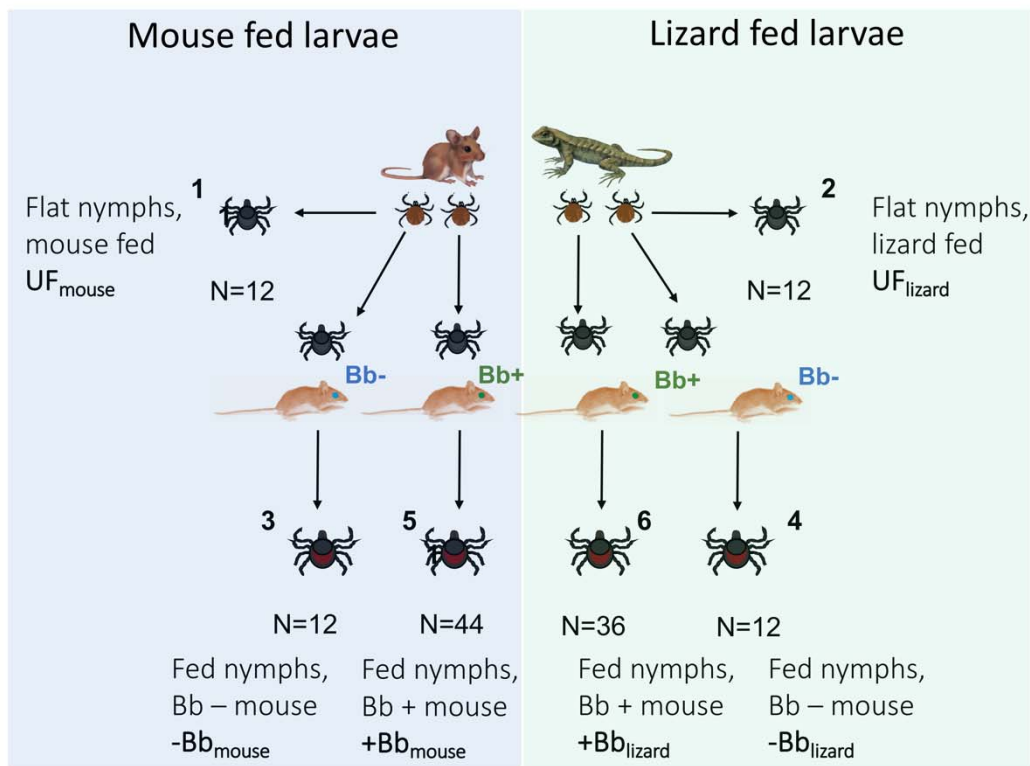

614

615 **Fig. 1** Transmission experiment design. Replete larval *I. pacificus* were obtained from  
616 *P. maniculatus* mice or *S. occidentalis* lizards. Successfully molted ticks from both  
617 groups were then either immediately sacrificed as unfed nymphs (groups 1&2) or fed on  
618 uninfected (groups 3 & 4) and *Bb*-infected (groups 5 & 6) C3H/HeJ mice. The *Bb*-fed  
619 ticks were analyzed via qPCR for *Bb* infection status. RNA from all groups was used to  
620 make RNA-seq libraries for transcriptomic analysis.

621

622

623

624

625

626

627

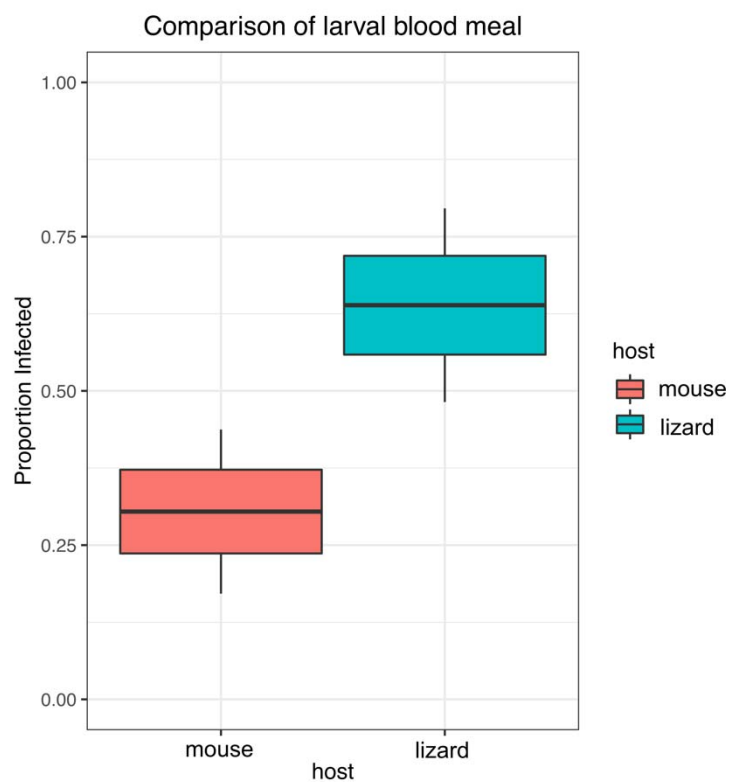

628

629 **Fig. 2** Comparison of infection status of *Bb*-fed *I. pacificus* nymphs with prior larval  
630 bloodmeals on either mice (mouse-fed; +Bb<sub>mouse</sub>) or lizards (lizard-fed; +Bb<sub>lizard</sub>). Lizard-  
631 fed larvae were significantly more likely to become infected when subsequently feeding  
632 on a *B. burgdorferi* infected mouse as nymphs than nymphs that previously fed on mice  
633 as larvae, with 64% of lizard-fed ticks infected compared to 30% of the mouse-fed ticks.

634

635

636

637

638

639

640

641

642

643

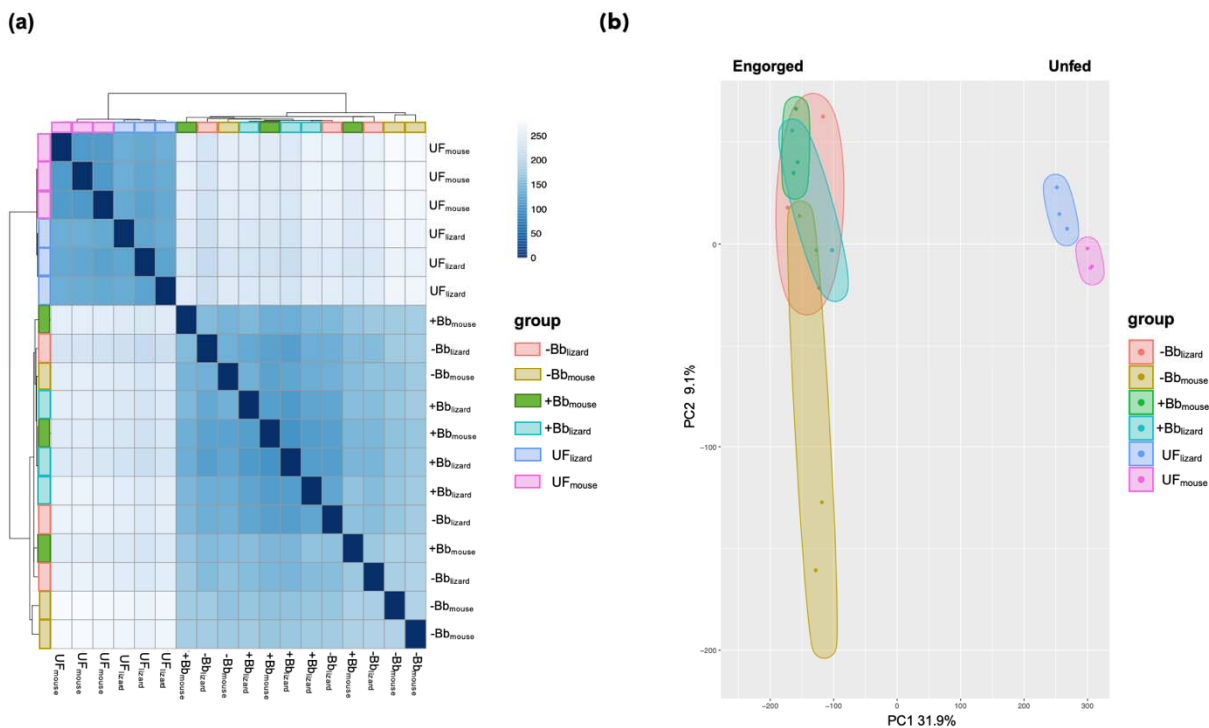

644 **Fig. 3** The similarity of transcriptomic profiles based on sample-to-sample distance  
645 shown by (a) a heat map plot of all samples. Visualization of the overall effect of  
646 experimental conditions shown by clustering in a (b) principal coordinate analysis on all  
647 transcriptomic profiles with plotted 95% confidence ellipses around experimental  
648 replicates.  
649  
650

651

652

653

654

655

656

657

658

659

660

661

662

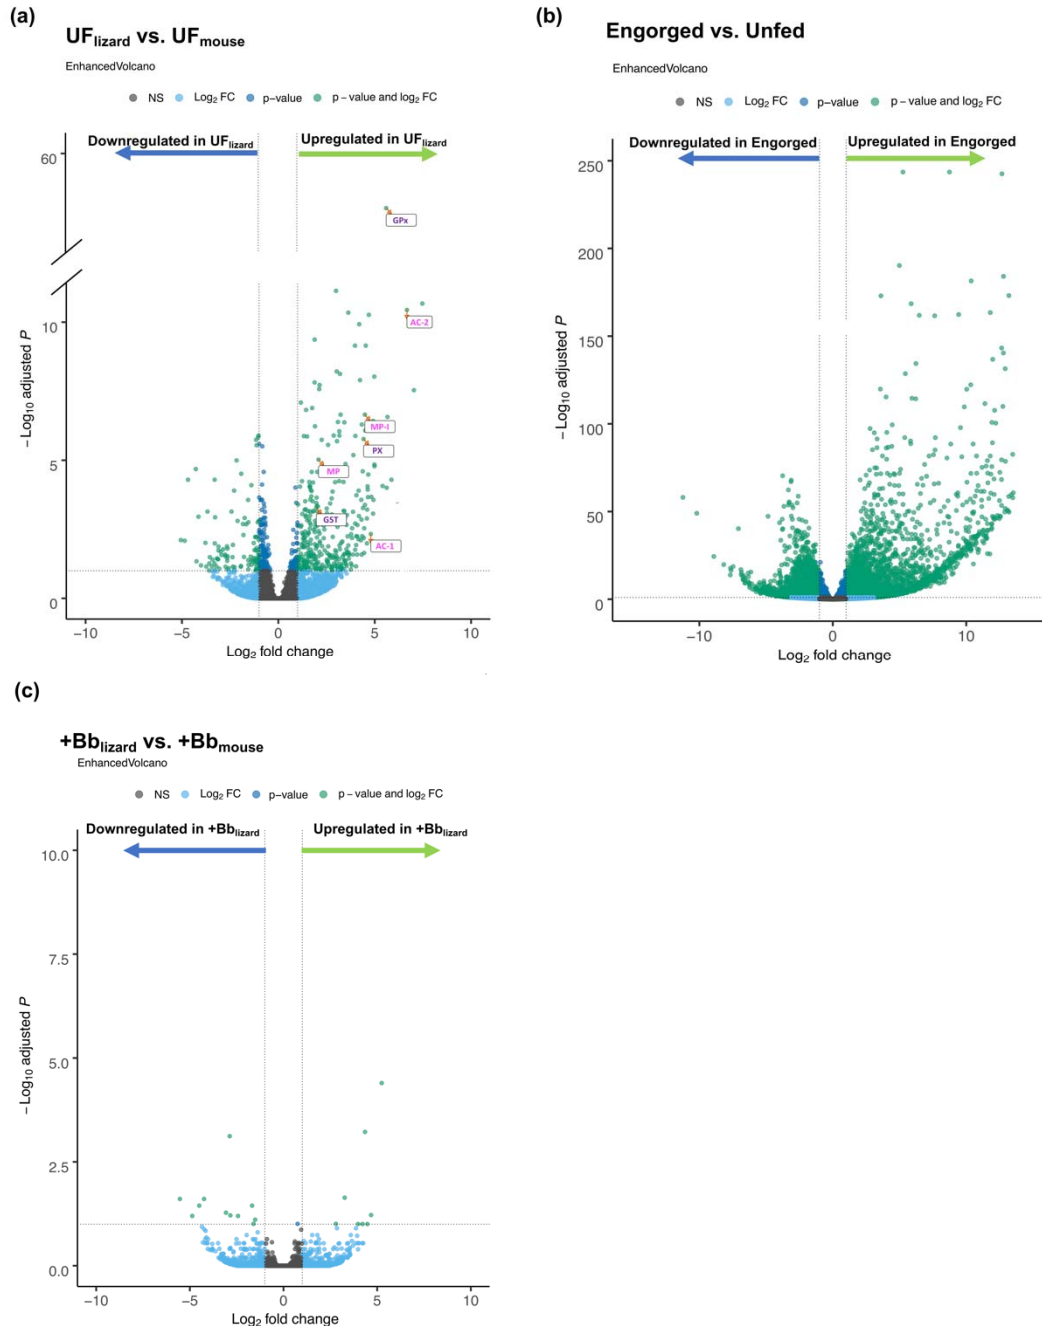

663  
664  
665  
666  
667  
668  
669  
670  
671  
672  
673

**Fig. 4** Volcano plots showing significant differential gene expression between the following: **(a)** UF<sub>mouse</sub> (reference) vs. UF<sub>lizard</sub> (comparison). Key annotated genes include tick antioxidants (purple print) glutathione peroxidase (GPx), glutathione S transferase (GST), peroxidase (PX) and antimicrobial peptides (pink print) acanthoscurrin-1 (AC-1), acanthoscurrin-2-like (AC-2), micropulsin (MP) and micropulsin isoform (MP-1). **(b)** Engorged (reference) vs. Unfed (comparison) and **(c)** +Bb<sub>mouse</sub> (reference) vs. +Bb<sub>lizard</sub> (comparison). Green points above the dotted x-axis represent genes significantly up or downregulated (padj value < 0.05 and log<sub>2</sub>FC > |1|).

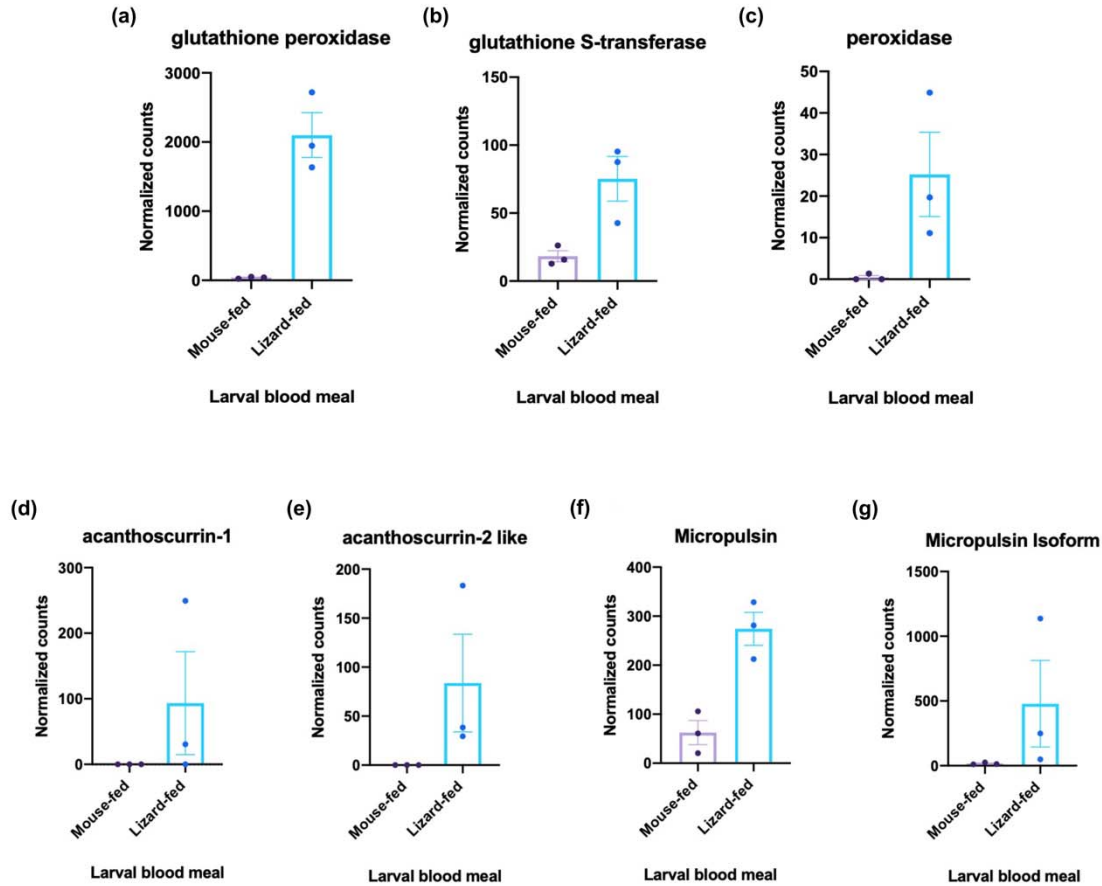

674  
675  
676  
677  
678  
679  
680  
681

**Fig. 5** Comparison of key significant DEGs in unfed comparison  $UF_{lizard}$  vs.  $UF_{mouse}$ . Graphs show the comparison of significantly DEGs using Wald's test on normalized transcript for tick antioxidants (a) glutathione peroxidase (padj value= 2.79e-59) (b) glutathione-S-transferase (padj value= .0005) (c) peroxidase (padj value = 1.34e-6) and antimicrobial peptides (d) acanthoscurrin-1 (padj value=.003) (e) acanthoscurrin-2 like (f) micropulsin (padj value= 1.04e-5) (g) micropulsin isoform (padj value = 1.22e-7).

682  
683  
684  
685  
686  
687  
688

689 **Tables**

690 **Table 1.** Summary of results from a generalized mixed-effect model (GLMM) with  
691 binomial distribution examining the correlation between lizard larval blood host and the  
692 probability of infection in the nymphal stage. Inoculum load of host was included as a  
693 random effect to account for differences between experimental trials.  
694  
695  
696

---

| Response         | Fixed effect            | Estimate | Standard Error | z value | p value |
|------------------|-------------------------|----------|----------------|---------|---------|
| Infection status | (Intercept)             | -1.02    | .51            | -2.023  | <.05*   |
| Infection status | Lizard larval bloodmeal | 1.51     | .51            | 2.95    | <.01**  |

---

697
